## Supplemental Tables

**Tab. S1.** Duplications and larger expansions of chemosensory gene families.

**Tab. S2.** Homology of OR subfamily tandem arrays.

**Tab. S3.** Gene numbers per OR subfamily for all bee species examined.

**Tab. S4.** Patterns of selection in chemosensory genes between orchid bee species pairs

**Tab. S5.** Branches under selection.

## Supplemental Datasets

**Dataset S1.** Contains detailed results of the selection analysis, homology of genomic locations of non-OR chemosensory gene families, and all chemosensory gene sequences annotated.

**Tab. S1**

| Gene family  | Honey bees | Bumble bees | Stingless bees | Orchid bees | within Orchid bees |
|--------------|------------|-------------|----------------|-------------|--------------------|
| ORs          | 27         | 32          | 25             | 16          | 31                 |
| GRs          | 2          | 3           | 1              | 1           | 2                  |
| IRs          | 0          | 0           | 0              | 0           | 1                  |
| CSPs         | 0          | 0           | 0              | 0           | 0                  |
| OBPs         | 3          | 1           | 0              | 1           | 4                  |
| <b>Total</b> | 32         | 36          | 26             | 18          | 38                 |

**Tab. S2**

| Sub-family      | <i>Eg. dilemma</i> | <i>Ef. mexicana</i>             | Honey bee       | Bumble bee   | Stingless bee                      | Homolog    |
|-----------------|--------------------|---------------------------------|-----------------|--------------|------------------------------------|------------|
| <b>G11A</b>     | 0                  | 812                             | 11.18           | 11.4         | 435748, 435971, (435874)           | Y          |
| <b>G02A</b>     | 29                 | 2792                            | 2.17            | 2.3          | 435794                             | Y          |
| <b>G09A-B</b>   | 45                 | 1523, 7050                      | 9.10            | 9.4          | 435845                             | Y          |
| <b>G12A</b>     | 61                 | 221                             | 12.4, 12.5      | 15.6         | 435908, 435704, 438518, 435897     | Y          |
| <b>G13A</b>     | 3                  | 124                             | (13.5), 13.6    | 13.5         | 435896                             | Y          |
| <b>G13A out</b> | NA                 | NA                              | 10.26           | Un980        | 435727                             | Y          |
| <b>G04A</b>     | 30                 | 2792                            | 4.8, 4.7, 9.10* | 4.5          | 435699, (435820)                   | Y          |
| <b>G12B</b>     | 10                 | 596                             | 12.13, (12.11)  | 12.1, Un1054 | 435774                             | Y          |
| <b>G09C</b>     | 15                 | 2143, (4744748261), 11296, (54) | (9.10), 9.12    | (9.1), 9.5   | (435845), (435701), 435796, 435859 | Y but OR73 |

|                 |                            |                           |                                       |                      |                            |                |
|-----------------|----------------------------|---------------------------|---------------------------------------|----------------------|----------------------------|----------------|
| <b>G09C out</b> | (2)                        | 15773                     | 1.27                                  | 1.3                  | 435752                     | Y              |
| <b>GUnA</b>     | NA                         | NA                        | (7.19), Un26, (Un73), (Un132), (Un37) | 10.4                 | 435732, 435891, (435731)   | N              |
| <b>G15A</b>     | 5                          | 1837                      | 15.19                                 | 15.5                 | 435821                     | Y              |
| <b>Orco</b>     | 267                        | 167                       | 1.10                                  | Un633                | 435750                     | Y              |
| <b>G07A</b>     | NA                         | 2501                      | 7.19                                  | 10.4                 | 435732                     | Y              |
| <b>G09D</b>     | 145                        | 2143                      | 9.10                                  | 9.1                  | 435845                     | Y              |
| <b>G05A</b>     | 14                         | (1653)                    | 5.14                                  | 5.1                  | 435863                     | Y              |
| <b>G14A</b>     | 7                          | (4744748667), (4491), 422 | 14.1                                  | (1.7), 14.7          | (435834), 435970, (435938) | Y              |
| <b>G14B</b>     | 56                         | (5018), (2888)            | 14.15, (14.14)                        | (14.2), 14.4, (14.5) | 435711                     | Y              |
| <b>G15B</b>     | NA                         | NA                        | 15.19                                 | 15.5                 | NA                         | Y              |
| <b>G05B</b>     | (388), (502), (200), (359) | (616), (2720), (2217)     | (5.15), (5.20), 5.18                  | 3.4                  | 435827                     | Y              |
| <b>G11B</b>     | 0                          | 3780                      | 11.18                                 | (11.4), 11.1, (11.5) | 435776                     | A+E Y<br>B+M Y |
| <b>G01A</b>     | 19                         | (13082), 4744748268       | 1.31                                  | 1.8                  | 435717                     | Y              |
| <b>GUnB</b>     | NA                         | NA                        | NA                                    | NA                   | NA                         | NA             |
| <b>G01B</b>     | (40), (17), (26)           | (572)                     | 1.21                                  | 7.1                  | (435724), (435732)         | Y              |
| <b>G02B</b>     | 11                         | 2332, (4744748507)        | 2.3, 2.11                             | 2.1, 2.2             | 435692, 435794             | Y              |
| <b>GUnC</b>     | NA                         | NA                        | NA                                    | NA                   | NA                         | NA             |

Locations of tandem arrays corresponding to OR subfamilies are indicated by scaffold numbers for each species. In case the assembly was fragmented into multiple scaffolds, scaffolds are listed in order that matches homolog regions of the other species. Tandem arrays with homologous locations throughout the corbiculate bees are indicated by Y otherwise by N. Brackets indicate scaffolds that carried no ORs but were homologous to other species scaffolds carrying ORs. NA: not tested due to assembly fragmentation. \*: Outgroup of G is only found in the honey bee and on a different chromosome. 'Out': Indicates the outgroup of a subfamily found in a different location than the rest of the ORs in the subfamily. A: Honey bee. E: Orchid bee. B: Bumble bee. M: Stingless bee.

**Tab. S3**

| Sfamily      | Edil     | Evir† | Eimp† | Efla†  | Emer† | Ebom†     | Emex     | Amel  | Bter  | Mqua     | Sum |
|--------------|----------|-------|-------|--------|-------|-----------|----------|-------|-------|----------|-----|
| <b>G13A</b>  | 5        | 4     | 5     | 5      | 5     | 5         | 4[1]     | 7     | 12    | 8        | 60  |
| <b>G07A</b>  | 2        | 2     | 2     | 2      | 2     | 2         | 2        | 3     | 1     | 3[1]     | 21  |
| <b>G09B</b>  | 1        | 1     | 1     | 1      | 1     | 1         | 1        | 1     | 2     | 1        | 11  |
| <b>GUnC</b>  | 18(4)[1] | 8     | 11    | 11     | 7     | 8(1)      | 8(1)     | 12[1] | 9     | 20       | 112 |
| <b>G02B</b>  | 2[1]     | 1     | 1     | 1      | 1     | 1         | 1        | 1     | 1     | 1        | 11  |
| <b>G09A</b>  | 3        | 2     | 3     | 2      | 1     | 2         | 10(1)[1] | 3     | 1     | 1        | 28  |
| <b>G04A</b>  | 8(3)     | 1     | 0     | 2(1)   | 2     | 0         | 8(2)[2]  | 25[2] | 11    | 1        | 58  |
| <b>G05B</b>  | 0        | 0     | 1     | 1      | 1     | 1         | 0        | 1     | 1     | 1        | 7   |
| <b>G11B</b>  | 1        | 1     | 1     | 1      | 1     | 1         | 1        | 1     | 3     | 2        | 13  |
| <b>G12B</b>  | 5        | 3     | 4(1)  | 5      | 5     | 3         | 8        | 8     | 10    | 12(1)    | 63  |
| <b>G11A</b>  | 12(3)    | 7     | 8     | 7      | 9     | 10        | 11       | 9[1]  | 12    | 13(1)[1] | 98  |
| <b>9Exon</b> | 26(6)    | 12    | 14(1) | 16 (1) | 18    | 15        | 28(2)[2] | 44[3] | 37    | 29(2)[1] | 239 |
| <b>G01A</b>  | 1        | 1     | 1     | 1      | 1     | 1         | 1        | 1     | 1     | 1        | 10  |
| <b>GUnB</b>  | 2(1)     | 1     | 1     | 1      | 1     | 1         | 0        | 0     | 0     | 1        | 8   |
| <b>G09C</b>  | 5(1)     | 4     | 4     | 4      | 5[1]* | 5[1]*     | 4[2]     | 3     | 11[3] | 24(3)[1] | 69  |
| <b>G15A</b>  | 2        | 2     | 2     | 2      | 2     | 2         | 2        | 6     | 11    | 2        | 33  |
| <b>G02A</b>  | 35[2]    | 22    | 26    | 29     | 27(1) | 33(2)[1]* | 36[4]    | 60[1] | 46    | 66(9)[5] | 380 |
| <b>GUnA</b>  | 23(7)    | 8     | 12    | 13 (1) | 7     | 7         | 12(4)[1] | 6     | 7     | 5        | 100 |
| <b>G09D</b>  | 1        | 1     | 1     | 1      | 1     | 1         | 1        | 1     | 1     | 1        | 10  |
| <b>G05A</b>  | 1        | 1     | 1     | 1      | 1     | 1         | 0        | 1     | 1     | 1        | 9   |
| <b>G14A</b>  | 1        | 1     | 1     | 1      | 1     | 1         | 1        | 1     | 4     | 7[2]     | 19  |
| <b>G14B</b>  | 1        | 1     | 1     | 1      | 1     | 1         | 0        | 1     | 1     | 1        | 9   |
| <b>G15B</b>  | 0        | 0     | 0     | 0      | 1     | 1         | 0        | 1     | 1     | 0        | 4   |

|             |                        |           |               |               |                   |                   |                        |                |               |                        |             |
|-------------|------------------------|-----------|---------------|---------------|-------------------|-------------------|------------------------|----------------|---------------|------------------------|-------------|
| <b>G12A</b> | 53(16)[10]             | 12        | 20(4)         | 22 (2)        | 25                | 26 (2)            | 30[1]                  | 23[2]          | 17[1]         | 20(3)                  | 248         |
| <b>Orco</b> | 1                      | 1         | 1             | 1             | 1                 | 1                 | 1                      | 1              | 1             | 1                      | 10          |
| <b>G01B</b> | 0                      | 0         | 0             | 0             | 1                 | 0                 | 0                      | 1              | 1             | 0                      | 3           |
| <b>Sum</b>  | <b>183(41)</b><br>[14] | <b>85</b> | <b>108(6)</b> | <b>115(5)</b> | <b>110(1)[1]*</b> | <b>115(5)[2]*</b> | <b>142(10)</b><br>[14] | <b>177[10]</b> | <b>166[4]</b> | <b>193(19)</b><br>[11] | <b>1394</b> |

9Exon corresponds to OR Subfamilies G05B, G04A, G11B, G12A, and G11A. †indicates species with transcriptome information only. \* indicates expressed ORs with nonsense stop codon that were defined as pseudogenes. Numbers in () indicate incomplete ORs of length<300AA and [] indicates OR pseudogenes of total number.

**Tab. S4**

| Gene family | <i>Eg. dilemma - Eg. viridissima</i> | <i>Eg. flammea - Eg. imperialis</i> | <i>El. bombiformis - El. meriana</i> |
|-------------|--------------------------------------|-------------------------------------|--------------------------------------|
| <b>ORs</b>  | 2 (1 1)                              | 7 (5 3)                             | 3 (3 0)                              |
| <b>GRs</b>  | 0                                    | 1 (0 1)                             | 1 (1 0)                              |
| <b>IRs</b>  | 1 (1 0)                              | 0                                   | 0                                    |
| <b>OBPs</b> | 0                                    | 1 (0 1)                             | 0                                    |
| <b>CSPs</b> | 0                                    | 0                                   | 0                                    |

Orthologous chemosensory genes under positive selection between a species pair are indicated. Chemosensory genes under selection detected with the branch-site model approach and the pairwise approach, respectively, are shown in brackets.

**Tab. S5**

| Gene family   | All Species              |                              |                                 | Species with genomes*    |                              |                                 |
|---------------|--------------------------|------------------------------|---------------------------------|--------------------------|------------------------------|---------------------------------|
|               | Branches under selection | Thereof duplicated branches† | Thereof non-duplicated branches | Branches under selection | Thereof duplicated branches† | Thereof non-duplicated branches |
| <b>ORs</b>    | 69                       | 26 (0.38)                    | 43                              | 53                       | 25 (0.47)                    | 28                              |
| <b>GRs</b>    | 28                       | 9 (0.32)                     | 19                              | 21                       | 9 (0.43)                     | 12                              |
| <b>IRs</b>    | 6                        | 0 (0)                        | 6                               | 5                        | 0 (0)                        | 5                               |
| <b>OBPs</b>   | 7                        | 3 (0.43)                     | 4                               | 6                        | 3 (0.5)                      | 3                               |
| <b>CSPs</b>   | 1                        | 0 (0)                        | 1                               | 0                        | 0 (0)                        | 0                               |
| <b>Total§</b> | 111                      | 38 (0.32)                    | 73                              | 85                       | 37 (0.41)                    | 48                              |

\* *Apis mellifera*, *Bombus terrestris*, *Melipona quadrifasciata*, *Euglossa dilemma* and *Eufriesea mexicana*. † The proportion of duplicated branches of all branches under selection is given in brackets. § A total of 2513 branches of which 638 were duplication branches and 1875 were non-duplication branches were tested.
